# Supplementary material for: Peptide-imprinted polymer microspheres prepared by precipitation polymerization using a single bi-functional monomer
Source: Royal Society of Chemistry journal article supplement (doi:10.1039/b814967d), 2009-01-01
Supplement: b814967d.pdf [file b814967d.pdf]

# Electronic Supplementary Information (ESI)

## **Peptide-imprinted polymer microspheres prepared by precipitation polymerization using a single bi-functional monomer**

*Keiichi Yoshimatsu,<sup>a</sup> Jason LeJeune,<sup>b</sup> David A. Spivak,<sup>b</sup> and Lei Ye<sup>a,\*</sup>*

<sup>a</sup> Pure and Applied Biochemistry, Chemical Center, Lund University, Box 124, S-221 00 Lund, Sweden

<sup>b</sup> Department of Chemistry, Louisiana State University, Baton Rough, Louisiana 70803, USA

Email: [Lei.Ye@tbiokem.lth.se](mailto:Lei.Ye@tbiokem.lth.se)

### ***HPLC analysis of Pyr-Leu-enkephalin (5) and Leu-Enk-Pyr (6)***

Reverse phase HPLC analysis was carried out on a Chromolith Performance column (RP-18e) from Merck (Darmstadt, Germany) mounted on a LaChrom L-7100 solvent delivery system with L-7455 diode array detector, and a software package D-7000 HPLC System Manager (Merck KgaA, Darmstadt, Germany). Solvent A: 0.1% trifluoroacetic acid in water, B: 0.1% trifluoroacetic acid in acetonitrile. Flow rate: 0.5 mL min<sup>-1</sup>. Compounds were separated by an isocratic elution (A: B = 50:50) and monitored by UV absorbance at 240 nm.

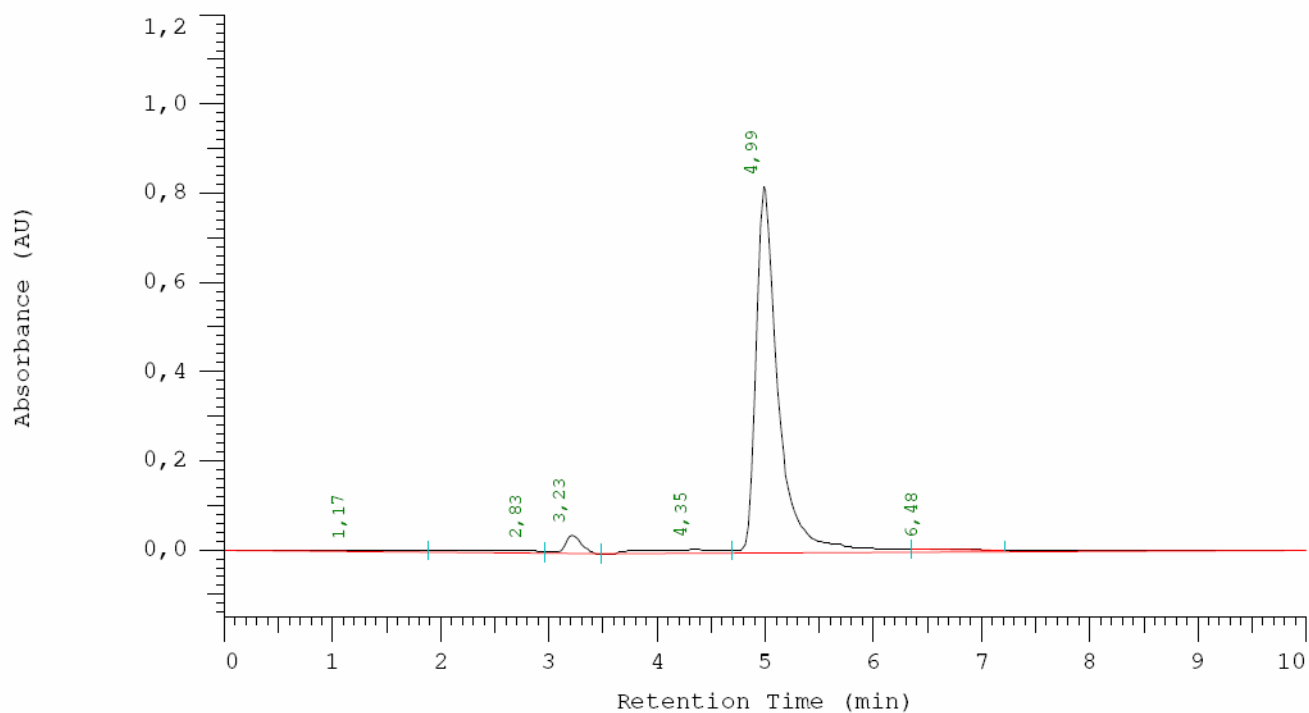

**Figure S1.** HPLC analysis of Pyr-Leu-Enk (**5**).

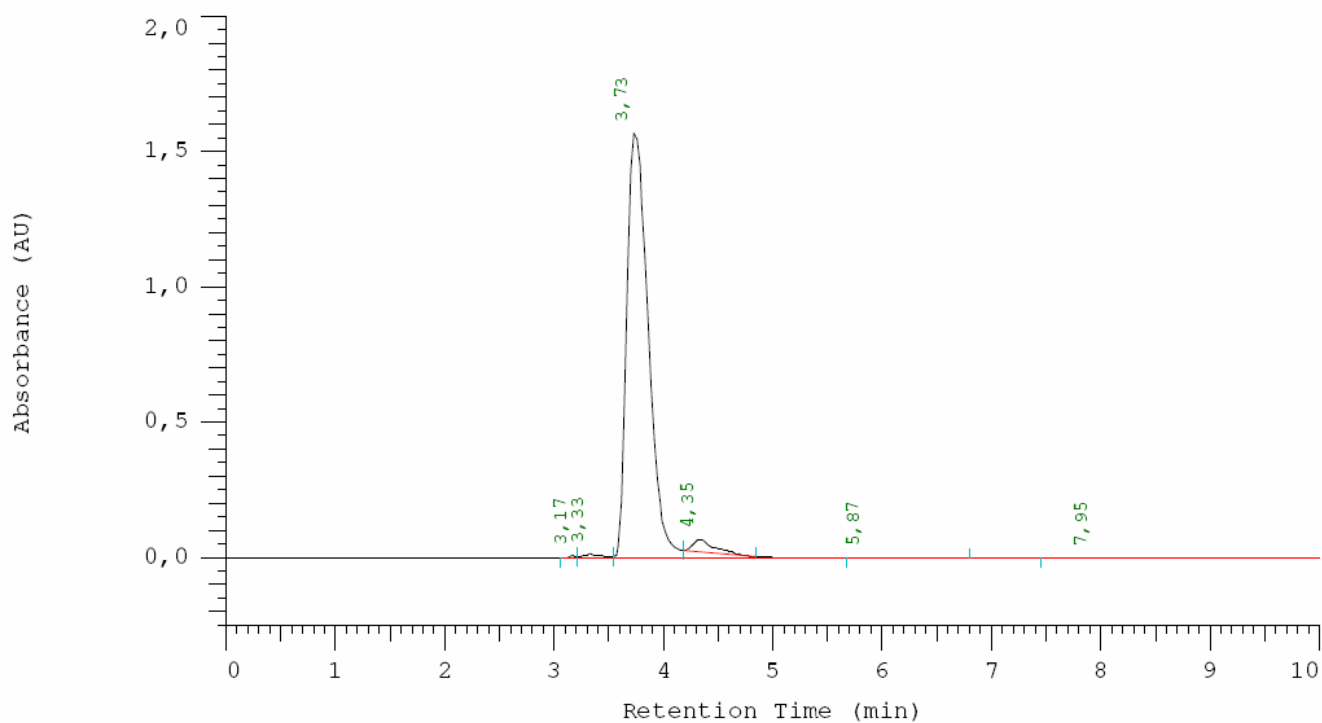

**Figure S2.** HPLC analysis of Leu-Enk-Pyr (**6**).
